# Supplementary material for: Fine-scale spatial distribution of deltamethrin resistance and population structure of Anopheles funestus and Anopheles arabiensis populations in Southern Mozambique
Source: Springer Nature journal article supplement (doi:10.1186/s12936-023-04522-5), 2023-03-14
Supplement: MOESM1 [file 24623142]

## Supplemental information

**Table S1. CDC bottle bioassay mortality data of 1x deltamethrin exposure across Manhica district.** following 30 minute (diagnostic time) and 120 minute (end of assay) exposure of deltamethrin at 1x the diagnostic dose (12.5ug/bottle) and 5x the diagnostic dose (60ug/bottle). Following morphological identification, mortality data of *An. funestus* s.s. and *An. arabiensis* were calculated.

|                          | Insecticide | concentration | All specimens                |             | All specimens                 |             | <i>An. funestus</i> s.s.      |             | <i>An. arabiensis</i>          |             |
|--------------------------|-------------|---------------|------------------------------|-------------|-------------------------------|-------------|-------------------------------|-------------|--------------------------------|-------------|
|                          |             |               | 30mins mortality exposed (%) | control (%) | 120mins mortality exposed (%) | control (%) | 120mins mortality exposed (%) | control (%) | 120 mins mortality exposed (%) | control (%) |
| 3 de Fevereiro           | DM          | 1x            | 10.1 (n=89)                  | 0 (n=17)    | 43.8 (n=89)                   | 0 (n=17)    | 40.8 (n=76)                   | 0 (n=14)    | 87.5 (n=8)                     | NA          |
|                          | DM          | 5x            | 28.4 (n=81)                  | 0 (n=22)    | 71.6 (n=81)                   | 0 (n=22)    | 76.0 (n=50)                   | 0 (n=19)    | 100 (n=3)                      | 0 (n=1)     |
| Bobole                   | DM          | 1x            | 8.5 (n=82)                   | 0 (n=18)    | 19.5 (n=82)                   | 0 (n=18)    | 15.2 (n=79)                   | 0 (n=17)    | 100 (n=2)                      | NA          |
|                          | DM          | 5x            | 28.6 (n=63)                  | 0 (n=18)    | 85.7 (n=63)                   | 0 (n=16)    | 79.5 (n=44)                   | 0 (n=12)    | 82.4 (n=17)                    | 0 (n=4)     |
| Buna                     | DM          | 1x            | 3.9 (n=129)                  | 0 (n=34)    | 6.2 (n=129)                   | 0 (n=34)    | 4.1 (n=123)                   | 0 (n=33)    | 100 (n=3)                      | NA          |
|                          | DM          | 5x            | 4.4 (n=113)                  | 0 (n=12)    | 7.1 (n=113)                   | 0 (n=12)    | 2.8 (n=109)                   | 0 (n=12)    | 100 (n=3)                      | NA          |
| Chobela                  | DM          | 1x            | 85.0 (n=60)                  | 0 (n=20)    | 100 (n=60)                    | 0 (n=20)    | 100 (n=3)                     | NA          | 100 (n=50)                     | 0 (n=18)    |
|                          | DM          | 5x            | 99.1 (n=111)                 | 0 (n=24)    | 99.1 (n=111)                  | 0 (n=24)    | 92.3 (n=13)                   | 0 (n=3)     | 100 (n=38)                     | 0 (n=9)     |
| Ilha Josina              | DM          | 1x            | 88.8 (n=89)                  | 0 (n=22)    | 91.0 (n=89)                   | 0 (n=22)    | 53.3 (n=15)                   | 0 (n=4)     | 98.5 (n=67)                    | 0 (n=18)    |
|                          | DM          | 5x            | 94.4 (n=89)                  | 0 (n=15)    | 96.6 (n=89)                   | 0 (n=15)    | 66.7 (n=9)                    | 0 (n=2)     | 100 (n=73)                     | 0 (n=11)    |
| Macia                    | DM          | 1x            | 10.9 (n=128)                 | 0 (n=29)    | 70.3 (n=128)                  | 0 (n=29)    | 70.0 (n=120)                  | 0 (n=27)    | 100 (n=5)                      | 0 (n=2)     |
|                          | DM          | 5x            | 21.8 (n=110)                 | 0 (n=26)    | 77.3 (n=110)                  | 0 (n=26)    | 77.4 (n=106)                  | 0 (n=22)    | 100 (n=4)                      | 0 (n=3)     |
| Maragra Maciana          | DM          | 1x            | 31.6 (n=19)                  | 0 (n=9)     | 52.6 (n=19)                   | 0 (n=9)     | 60.0 (n=20)                   | 0 (n=4)     | 100 (n=1)                      | 0 (n=2)     |
|                          | DM          | 5x            | 37.5 (n=16)                  | 0 (n=10)    | 75.0 (n=16)                   | 0 (n=10)    | NA                            | NA          | NA                             | NA          |
| Muleleman                | DM          | 1x            | 81.6 (n=76)                  | 0 (n=13)    | 100 (n=76)                    | 0 (n=13)    | 100 (n=1)                     | NA          | 100 (n=73)                     | 0 (n=13)    |
|                          | DM          | 5x            | 100 (n=70)                   | 0 (n=17)    | 100 (n=70)                    | 0 (n=17)    | NA                            | NA          | 100 (n=69)                     | 0 (n=18)    |
| Palmeira 1°/2°/4° Bairro | DM          | 1x            | 7.9 (n=63)                   | 0 (n=15)    | 38.1 (n=63)                   | 0 (n=15)    | 47.9 (n=48)                   | 0 (n=14)    | 100 (n=1)                      | 0 (n=2)     |
|                          | DM          | 5x            | 14.8 (n=61)                  | 0 (n=15)    | 63.9 (n=61)                   | 0 (n=15)    | 63.6 (n=55)                   | 0 (n=15)    | NA                             | NA          |
| Punguene                 | DM          | 1x            | 33.9 (n=165)                 | 0 (n=50)    | 84.2 (n=165)                  | 0 (n=50)    | 84.3 (n=121)                  | 0 (n=44)    | 100 (n=12)                     | 0 (n=3)     |
|                          | DM          | 5x            | 50.3 (n=161)                 | 0 (n=46)    | 84.5 (n=161)                  | 0 (n=46)    | 87.7 (n=154)                  | 0 (n=40)    | 100 (n=38)                     | 0 (n=3)     |
| Ribangua                 | DM          | 1x            | 18.3 (n=93)                  | 0 (n=22)    | 44.1 (n=93)                   | 0 (n=22)    | 39.0 (n=82)                   | 0 (n=21)    | 100 (n=6)                      | NA          |
|                          | DM          | 5x            | 82.3† (n=84)                 | 5.9 (n=17)  | 93.7† (n=84)                  | 5.9 (n=17)  | 100 (n=73)                    | 7.1 (n=14)  | 100 (n=9)                      | 0 (n=3)     |

DM=Deltamethrin; † Abbott's formula applied

**Table S2.** CDC bottle bioassay mortality data of different barrios in the town of Palmeira following 30-minute (diagnostic time) and 120-minute (end of assay) exposure of deltamethrin at 1x (12.5ug/bottle) and 5x (60ug/bottle) the diagnostic dose. Following morphological identification, mortality data of *An. funestus* s.s. and *An. arabiensis* were calculated.

| Neighborhood            | Insecticide | concentration | All specimens            |            | All specimens             |            | <i>An. funestus</i>       |          | <i>An. arabiensis</i>      |         |
|-------------------------|-------------|---------------|--------------------------|------------|---------------------------|------------|---------------------------|----------|----------------------------|---------|
|                         |             |               | 30mins mortality exposed | control    | 120mins mortality exposed | control    | 120mins mortality exposed | control  | 120 mins mortality exposed | control |
| 1°, 2°, 4° Bairro       | DM          | 1x            | 7.9 (n=63)               | 0 (n=15)   | 38.1 (n=63)               | 0 (n=15)   | 47.9 (n=48)               | 0 (n=14) | 100 (n=1)                  | 0 (n=2) |
|                         | DM          | 5x            | 14.8 (n=61)              | 0 (n=15)   | 63.9 (n=61)               | 0 (n=15)   | 63.6 ((n=55)              | 0 (n=15) | NA                         | NA      |
| 3° Bairro A – Roadside  | DM          | 1x            | 9.6 (n=115)              | 2.4 (n=42) | 14.8 (n=115)              | 2.4 (n=42) | 16.2 (n=117)              | 0 (n=41) | 100 (n=3)                  | NA      |
|                         | DM          | 5x            | 22.6 (n=53)              | 0 (n=18)   | 52.8 (n=53)               | 0 (n=18)   | 55.1 (n=49)               | 0 (n=11) | NA                         | NA      |
| 3° Bairro A – Riverside | DM          | 1x            | 10.1 (n=79)              | 0 (n=19)   | 24.1 (n=79)               | 0 (n=19)   | 22.4 (n=67)               | 0 (n=19) | NA                         | NA      |
|                         | DM          | 5x            | 28.8 (n=66)              | 0 (n=21)   | 66.7 (n=66)               | 0 (n=21)   | 66.7 (n=60)               | 0 (n=21) | NA                         | NA      |
| 3° Bairro B             | DM          | 1x            | 10.4 (n=96)              | NA         | 29.2 (n=96)               | NA         | 26.6 (n=94)               | NA       | 100 (n=2)                  | NA      |
|                         | DM          | 5x            | 16.9 (n=77)              | 0 (n=22)   | 41.6 (n=77)               | 0 (n=22)   | 52.7 (n=74)               | 0 (n=23) | 100 (n=1)                  | NA      |
| 3° Bairro C             | DM          | 1x            | 9.2† (n=23)              | 4.2 (n=24) | 36.4† (n=23)              | 4.2 (n=24) | 22.2 (n=18)               | 0 (n=21) | 100 (n=5)                  | 0 (n=2) |
|                         | DM          | 5x            | NA                       | NA         | NA                        | NA         | NA                        | NA       | NA                         | NA      |
| 6° Bairro – Roadside    | DM          | 1x            | 17.7 (n=62)              | NA         | 87.1 (n=62)               | NA         | 86.2 (n=58)               | NA       | 100 (n=2)                  | NA      |
|                         | DM          | 5x            | 5.0 (n=180)              | 0 (n=41)   | 21.7 (n=180)              | 0 (n=41)   | 22.0 (n=132)              | 0 (n=40) | 100 (n=3)                  | 0 (n=2) |
| 6° Bairro – Riverside   | DM          | 1x            | 6.4 (n=63)               | 0 (n=23)   | 61.9 (n=63)               | 0 (n=23)   | 61.3 (n=62)               | 0 (n=23) | NA                         | NA      |
|                         | DM          | 5x            | 24.4 (n=82)              | NA         | 84.2 (n=82)               | NA         | 84.3 (n=51)               | NA       | 100 (n=1)                  | NA      |
| 7° Bairro A – Roadside  | DM          | 1x            | 6.9 (n=101)              | NA         | 11.9 (n=101)              | NA         | 9.3 (n=97)                | NA       | 100 (n=2)                  | NA      |
|                         | DM          | 5x            | 29.2 (n=65)              | 0 (n=16)   | 72.3 (n=65)               | 0 (n=16)   | 71.0 (n=62)               | 0 (n=15) | NA                         | NA      |
| 7° Bairro A – Riverside | DM          | 1x            | 5.6 (n=107)              | 0 (n=25)   | 50.5 (n=107)              | 0 (n=25)   | 60.2 (n=103)              | 0 (n=26) | 100 (n=4)                  | NA      |
|                         | DM          | 5x            | 13.3 (n=83)              | 0 (n=16)   | 63.9 (n=83)               | 0 (n=16)   | 58.2 (n=79)               | 0 (n=15) | 100 (n=1)                  | NA      |

**Table S3.** CDC bottle bioassay mortality data across the district following 30-minute (diagnostic time) and 120-minute (end of assay) exposure of bendiocarb at 1x the diagnostic dose (12.5ug/bottle). Following morphological identification, mortality data of *An. funestus s.s.* and *An. arabiensis* were calculated.

|                                | Insecticide | concentration | All specimens    |            | All specimens     |            | <i>An. funestus s.s.</i> |          | <i>An. arabiensis</i> |            |
|--------------------------------|-------------|---------------|------------------|------------|-------------------|------------|--------------------------|----------|-----------------------|------------|
|                                |             |               | 30mins mortality |            | 120mins mortality |            | 120mins mortality        |          | 120 mins mortality    |            |
|                                |             |               | exposed          | control    | exposed           | control    | exposed                  | control  | exposed               | control    |
| Chobela                        | BC          | 1x            | 100 (n=90)       | 0 (n=17)   | 100 (n=90)        | 0 (n=17)   | 100 (n=17)               | 0 (n=3)  | 100 (n=43)            | 0 (n=13)   |
| Muleleman                      | BC          | 1x            | 100 (n=90)       | 8.0 (n=25) | 100 (n=90)        | 4.0 (n=25) | 100 (n=1)                | 0 (n=1)  | 100 (n=89)            | 4.5 (n=22) |
| Palmeira<br>7° Bairro Roadside | BC          | 1x            | 99 (n=104)       | 0 (n=19)   | 100 (n=104)       | 0 (n=19)   | 100 (n=105)              | 0 (n=19) | NA                    | NA         |
| Ribangua                       | BC          | 1x            | 100 (n=73)       | 0 (n=17)   | 100 (n=73)        | 0 (n=17)   | 100 (n=66)               | 0 (n=17) | 100 (n=7)             | NA         |

**Table S4. Genetic variability of 6 microsatellite loci in *Anopheles arabiensis* from Southern Mozambique.** Number of alleles ( $N_{\text{allele}}$ ), observed ( $H_o$ ), expected heterozygosity ( $H_e$ ), and inbreeding coefficient ( $F_{IS}$ ) for each loci in *An. arabiensis* collected from five populations. Bold  $H_e$  indicate significant deviation ( $P < 0.00197$ ) from Hardy-Weinberg equilibrium.

| Locus            |                     | Populations    |                    |                          |                                 |                 | Overall (n=159) |
|------------------|---------------------|----------------|--------------------|--------------------------|---------------------------------|-----------------|-----------------|
|                  |                     | Chobela (N=33) | Ilha Josina (N=34) | Magude-Mulelemani (N=33) | Palmeira 1°/2°/4° Bairro (N=30) | Punguene (N=29) |                 |
| AGXH25           | $N_{\text{allele}}$ | 5              | 6                  | 6                        | 4                               | 5               | 6               |
|                  | $H_o$               | 0.12121        | 0.11765            | 0.09091                  | 0.06897                         | 0.13793         | 0.10759         |
|                  | $H_e$               | <b>0.66993</b> | <b>0.57682</b>     | <b>0.58695</b>           | <b>0.41077</b>                  | <b>0.51724</b>  | <b>0.56645</b>  |
|                  | $F_{IS}$            | 0.82135        | 0.79847            | 0.84713                  | 0.83456                         | 0.73678         | 0.80936         |
| AG2H85           | $N_{\text{allele}}$ | 6              | 4                  | 4                        | 4                               | 3               | 6               |
|                  | $H_o$               | 0.42424        | 0.45455            | 0.27273                  | 0.43333                         | 0.31034         | 0.37975         |
|                  | $H_e$               | <b>0.69790</b> | <b>0.58415</b>     | <b>0.64755</b>           | <b>0.68079</b>                  | <b>0.66606</b>  | <b>0.66050</b>  |
|                  | $F_{IS}$            | 0.39582        | 0.22456            | 0.58261                  | 0.36745                         | 0.53846         | 0.42376         |
| AG2H164          | $N_{\text{allele}}$ | 7              | 7                  | 9                        | 7                               | 7               | 12              |
|                  | $H_o$               | 0.45455        | 0.52941            | 0.72727                  | 0.43333                         | 0.62069         | 0.55346         |
|                  | $H_e$               | 0.52121        | 0.69271            | 0.72914                  | 0.55028                         | 0.59952         | 0.62901         |
|                  | $F_{IS}$            | 0.12965        | 0.23846            | 0.00260                  | 0.21540                         | -0.03597        | 0.11010         |
| AG3H127          | $N_{\text{allele}}$ | Monomorphic    | 2                  | Monomorphic              |                                 |                 | 2               |
|                  | $H_o$               |                | 0.00000            |                          |                                 |                 | 0.00000         |
|                  | $H_e$               |                | <b>0.16783</b>     |                          |                                 |                 | <b>0.03784</b>  |
|                  | $F_{IS}$            |                | 1.00000            |                          |                                 |                 | 1.00000         |
| AGXH100          | $N_{\text{allele}}$ | 6              | 7                  | 7                        | 7                               | 7               | 7               |
|                  | $H_o$               | 0.54545        | 0.65625            | 0.66667                  | 0.70000                         | 0.60714         | 0.63462         |
|                  | $H_e$               | 0.66107        | 0.65675            | 0.71329                  | 0.77401                         | 0.62468         | 0.68866         |
|                  | $F_{IS}$            | 0.17714        | 0.00077            | 0.06631                  | 0.09711                         | 0.02857         | 0.07663         |
| AG3H249          | $N_{\text{allele}}$ | 14             | 11                 | 15                       | 9                               | 9               | 18              |
|                  | $H_o$               | 0.64516        | 0.57576            | 0.61290                  | 0.56667                         | 0.64286         | 0.60784         |
|                  | $H_e$               | 0.74352        | 0.72448            | 0.79376                  | 0.63898                         | 0.74935         | <b>0.73215</b>  |
|                  | $F_{IS}$            | 0.13420        | 0.20782            | 0.23077                  | 0.11490                         | 0.14437         | 0.16987         |
| Mean across loci | $N_{\text{allele}}$ | 7.6            | 6.2                | 8.2                      | 6.2                             | 6.2             | 8.5             |
|                  | $H_o$               | 0.43812        | 0.38894            | 0.47410                  | 0.44046                         | 0.46379         | 0.38054         |
|                  | $H_e$               | 0.65873        | 0.56712            | 0.69414                  | 0.61097                         | 0.63137         | 0.55244         |
|                  | $F_{IS}$            | 0.33226        | 0.30441            | 0.31231                  | 0.27678                         | 0.26036         | 0.29934         |

**Table S5. Genetic variability of 6 microsatellite loci in *Anopheles funestus* s.s. from Southern Mozambique.** Number of alleles ( $N_{\text{allele}}$ ), observed ( $H_o$ ), expected heterozygosity ( $H_e$ ), and inbreeding coefficient ( $F_{IS}$ ) for each loci in *An. funestus* collected from five populations. Bold  $H_e$  indicate significant deviation ( $P < 0.00122$ ) from Hardy-Weinberg equilibrium.

| Locus            |                     | Populations     |                 |                       |                |                |                                 |                                     | Overall (n=324) |
|------------------|---------------------|-----------------|-----------------|-----------------------|----------------|----------------|---------------------------------|-------------------------------------|-----------------|
|                  |                     | Punguene (n=45) | Ribangua (n=49) | 3 de Fevereiro (n=53) | Bobole (n=33)  | Macia (n=48)   | Palmeira 1°/2°/4° Bairro (n=38) | Palmeira 7° Bairro Riverside (n=58) |                 |
| FunG             | $N_{\text{allele}}$ | 12              | 11              | 10                    | 10             | 13             | 10                              | 11                                  | 14              |
|                  | $H_o$               | 0.67442         | 0.62222         | 0.83019               | 0.74194        | 0.77778        | 0.78378                         | 0.80000                             | 0.75081         |
|                  | $H_e$               | <b>0.90315</b>  | <b>0.88190</b>  | 0.88266               | <b>0.87996</b> | <b>0.90637</b> | 0.81081                         | <b>0.86722</b>                      | <b>0.89508</b>  |
|                  | $F_{IS}$            | 0.25550         | 0.29680         | 0.05998               | 0.15905        | 0.14325        | 0.03378                         | 0.07818                             | 0.14555         |
| FunO             | $N_{\text{allele}}$ | 4               | 5               | 5                     | 4              | 5              | 3                               | 5                                   | 10              |
|                  | $H_o$               | 0.50000         | 0.38298         | 0.48148               | 0.40000        | 0.47826        | 0.48485                         | 0.33929                             | 0.43110         |
|                  | $H_e$               | 0.55669         | <b>0.57630</b>  | 0.58001               | 0.54407        | 0.56355        | 0.57576                         | 0.58526                             | <b>0.57114</b>  |
|                  | $F_{IS}$            | 0.10289         | 0.33786         | 0.17258               | 0.26814        | 0.15276        | 0.15997                         | 0.42249                             | 0.24581         |
| AFND6            | $N_{\text{allele}}$ | 11              | 12              | 11                    | 11             | 13             | 9                               | 9                                   | 19              |
|                  | $H_o$               | 0.46341         | 0.47727         | 0.44000               | 0.50000        | 0.40909        | 0.36364                         | 0.45098                             | 0.44643         |
|                  | $H_e$               | <b>0.86871</b>  | <b>0.84065</b>  | <b>0.82808</b>        | <b>0.82208</b> | <b>0.83438</b> | <b>0.87844</b>                  | <b>0.84547</b>                      | <b>0.85004</b>  |
|                  | $F_{IS}$            | 0.46964         | 0.43510         | 0.47118               | 0.39617        | 0.51259        | 0.59174                         | 0.46907                             | 0.47391         |
| AFND32           | $N_{\text{allele}}$ | 10              | 12              | 8                     | 8              | 9              | 7                               | 10                                  | 13              |
|                  | $H_o$               | 0.40000         | 0.57143         | 0.49057               | 0.54545        | 0.52083        | 0.44737                         | 0.51724                             | 0.50000         |
|                  | $H_e$               | <b>0.81448</b>  | <b>0.84999</b>  | <b>0.78365</b>        | <b>0.82517</b> | <b>0.80570</b> | <b>0.80175</b>                  | <b>0.83763</b>                      | <b>0.82604</b>  |
|                  | $F_{IS}$            | 0.51171         | 0.33001         | 0.37624               | 0.34247        | 0.35599        | 0.44533                         | 0.38456                             | 0.39080         |
| AFND40           | $N_{\text{allele}}$ | 8               | 8               | 7                     | 7              | 6              | 6                               | 6                                   | 9               |
|                  | $H_o$               | 0.26471         | 0.17073         | 0.23077               | 0.26667        | 0.29032        | 0.21053                         | 0.25000                             | 0.23741         |
|                  | $H_e$               | <b>0.82002</b>  | <b>0.84372</b>  | <b>0.77819</b>        | <b>0.78305</b> | <b>0.81227</b> | <b>0.82000</b>                  | <b>0.78771</b>                      | <b>0.81571</b>  |
|                  | $F_{IS}$            | 0.68047         | 0.79964         | 0.70549               | 0.66328        | 0.64637        | 0.74581                         | 0.68474                             | 0.70766         |
| FunD             | $N_{\text{allele}}$ | 19              | 16              | 18                    | 13             | 20             | 17                              | 20                                  | 30              |
|                  | $H_o$               | 0.79545         | 0.81633         | 0.84314               | 0.81818        | 0.85417        | 0.76316                         | 0.79310                             | 0.81308         |
|                  | $H_e$               | 0.90596         | 0.91668         | 0.90526               | 0.88904        | 0.89803        | 0.90000                         | 0.90690                             | <b>0.90485</b>  |
|                  | $F_{IS}$            | 0.12322         | 0.11049         | 0.06926               | 0.08085        | 0.04933        | 0.15379                         | 0.12644                             | 0.10161         |
| Mean across loci | $N_{\text{allele}}$ | 10.7            | 10.7            | 9.8                   | 8.8            | 11.0           | 8.7                             | 10.2                                | 15.8            |
|                  | $H_o$               | 0.51633         | 0.50683         | 0.55269               | 0.54537        | 0.55508        | 0.50889                         | 0.52510                             | 0.52980         |
|                  | $H_e$               | 0.81150         | 0.81821         | 0.79298               | 0.79056        | 0.80338        | 0.79779                         | 0.80503                             | 0.81048         |
|                  | $F_{IS}$            | 0.27470         | 0.22116         | 0.14982               | 0.17466        | 0.15967        | 0.20316                         | 0.18157                             | 0.19390         |

**Table S6. Linkage disequilibrium of six microsatellite loci for *An. funestus s.s.*** Statistically significant pairwise comparisons ( $P < 0.05$ ) are indicated by “+” in black boxes with the exact P-value in bold. Linkage disequilibrium that is not significant is indicated with a “-” ( $P > 0.00341$ ).

|        | FunG                            | FunO                            | AFND6                        | AFND32 | AFND40 | FunD |
|--------|---------------------------------|---------------------------------|------------------------------|--------|--------|------|
| FunG   | *                               |                                 |                              |        |        |      |
| FunO   | <b>+</b><br><b>(P= 0.00000)</b> | *                               |                              |        |        |      |
| AFND6  | -                               | <b>+</b><br><b>(P= 0.00000)</b> | *                            |        |        |      |
| AFND32 | -                               | -                               | -                            | *      |        |      |
| AFND40 | -                               | <b>+</b><br><b>(P= 0.012)</b>   | <b>+</b><br><b>(P=0.006)</b> | -      | *      |      |
| FunD   | <b>+</b><br><b>(P= 0.00000)</b> | -                               | -                            | -      | -      | *    |

Table S7. Analysis of molecular variance (AMOVA) of six microsatellite loci each in the *An. arabiensis* and *An. funestus* populations.

a) *An. arabiensis*

| Populations                          | Sum of squares | Variance components | Percentage variation |
|--------------------------------------|----------------|---------------------|----------------------|
| Among populations                    | 11.296         | 0.01053             | 0.63405              |
| Among individuals within populations | 327.771        | 0.50886             | 30.63518             |
| Within individuals                   | 178.500        | 1.14163             | 68.78077             |

b) *An. funestus* s.s.

| Populations                          | Sum of squares | Variance components | Percentage variation |
|--------------------------------------|----------------|---------------------|----------------------|
| Among populations                    | 28.291         | 0.01694             | 0.69575              |
| Among individuals within populations | 946.363        | 0.82898             | 34.03970             |
| Within individuals                   | 484.000        | 1.58941             | 65.26455             |

**Table S8. Estimated number of migrants among a) *An. arabiensis* and b) *An. funestus* populations.**

a) *An. arabiensis*

| Populations                     | Punguene | Magude-Mulelemani | Palmeira<br>1°/2°/4° Bairro | Chobela | Ilha Josina |
|---------------------------------|----------|-------------------|-----------------------------|---------|-------------|
| <b>Punguene</b>                 | *        |                   |                             |         |             |
| <b>Magude-Mulelemani</b>        | 47.3     | *                 |                             |         |             |
| <b>Palmeira 1°/2°/4° Bairro</b> | 16.9     | 24.8              | *                           |         |             |
| <b>Chobela</b>                  | 26.5     | 30.4              | 23.7                        | *       |             |
| <b>Ilha Josina</b>              | 9.4      | 56.2              | 15.0                        | 31.8    | *           |

b) *An. funestus* s.s.

| Populations                         | Punguene | Ribangua | 3 de Fevereiro | Bobole | Macia | Palmeira<br>1°/2°/4° Bairro | Palmeira<br>7° Bairro Riverside |
|-------------------------------------|----------|----------|----------------|--------|-------|-----------------------------|---------------------------------|
| <b>Punguene</b>                     | *        |          |                |        |       |                             |                                 |
| <b>Ribangua</b>                     | 101.4    | *        |                |        |       |                             |                                 |
| <b>3 de Fevereiro</b>               | 53.4     | 33.4     | *              |        |       |                             |                                 |
| <b>Bobole</b>                       | 17.7     | 21.9     | 16.7           | *      |       |                             |                                 |
| <b>Macia</b>                        | 21.5     | 43.0     | 9.8            | 27.8   | *     |                             |                                 |
| <b>Palmeira 1°/2°/4° Bairro</b>     | 11.8     | 16.3     | 8.6            | 5.7    | 8.2   | *                           |                                 |
| <b>Palmeira 7° Bairro Riverside</b> | 71.8     | 54.5     | 33.0           | 18.7   | 31.8  | 29.4                        | *                               |



**Table S9. Microsatellite primer sequences and primer labels for microsatellite analysis of a) *Anopheles arabiensis* and b) *An. funestus*.**a) *An. arabiensis*

| Microsatellite | Primer    | Primer sequence (5' to 3')          |
|----------------|-----------|-------------------------------------|
| AGXH25         | AGXH25-F  | /56-FAM/ GCC GAA AAC ATT CCA ACA GG |
|                | AGXH25-R  | CAG TTA TGT CGG CAT GCT AC          |
| AG2H85         | AG2H85-F  | /5HEX/ ATT TAT CAT ACG GCG CCC AC   |
|                | AG2H85-R  | TTG AAA GGT TGC AAC GAG CGC G       |
| AG2H164        | AG2H164-F | /56-FAM/ GTG GTA CCT CTG TCA TAC CC |
|                | AG2H164-R | ACA ACA AAA GGC ACC GCA GC          |
| AG3H127        | AG3H127-F | /5HEX/ CCT CTA ACT CGA TTA CCG TG   |
|                | AG3H127-R | GTC AGG GAA TTG GAA AGA GC          |
| AGXH100        | AGXH100-F | /56-FAM/ AGA AAG GAA ATG TAA CGC GG |
|                | AGHX100-R | CTT TCA TCT TGG CTG GCT GC          |
| AG3H249        | AG3H249F  | /5HEX/ATG TTC CGC ACT TCC GAC AC    |
|                | AG3H249-R | GCG AGC TAC AAC AAT GGA GC          |

b) *An. funestus*

| Microsatellite | Primer   | Primer sequence (5' to 3')           |
|----------------|----------|--------------------------------------|
| FunO           | FunO-F   | /5HEX/ GCA CAC ATT TCA GGC AGC       |
|                | FunO-R   | GCC CAC ATT CTG CAC CTT              |
| FunG           | FunG     | /56-FAM/ GAG CAA GCA GCT TAC TGC AC  |
|                | FunG-R   | ACG TTC AGT GCA CAT CAA TG           |
| AFND6          | AFND6-F  | /5HEX/ GCT TCT TCT CCC CTA ATC TG    |
|                | AFND6-R  | TCC TGC TTT TTA GTT TGT CG           |
| AFND32         | AFND32-F | /56-FAM/ GAA GCA TTT TGG GTT AGA CTC |
|                | AFND32-R | GCA GTT GTT TAC CTT TCA CTG          |
| FunD           | FunD-F   | /5HEX/ GCT AAC TAC TCC GAA GCG CT    |
|                | FunD-R   | GAT CGC AAA ACT TCC GGT T            |
| AFND40         | AFND40-F | /56-FAM/ ATT CAT CCT GTG ATG CTT TG  |
|                | AFND40-R | AGG CTC TTC TTT GCA CTG T            |

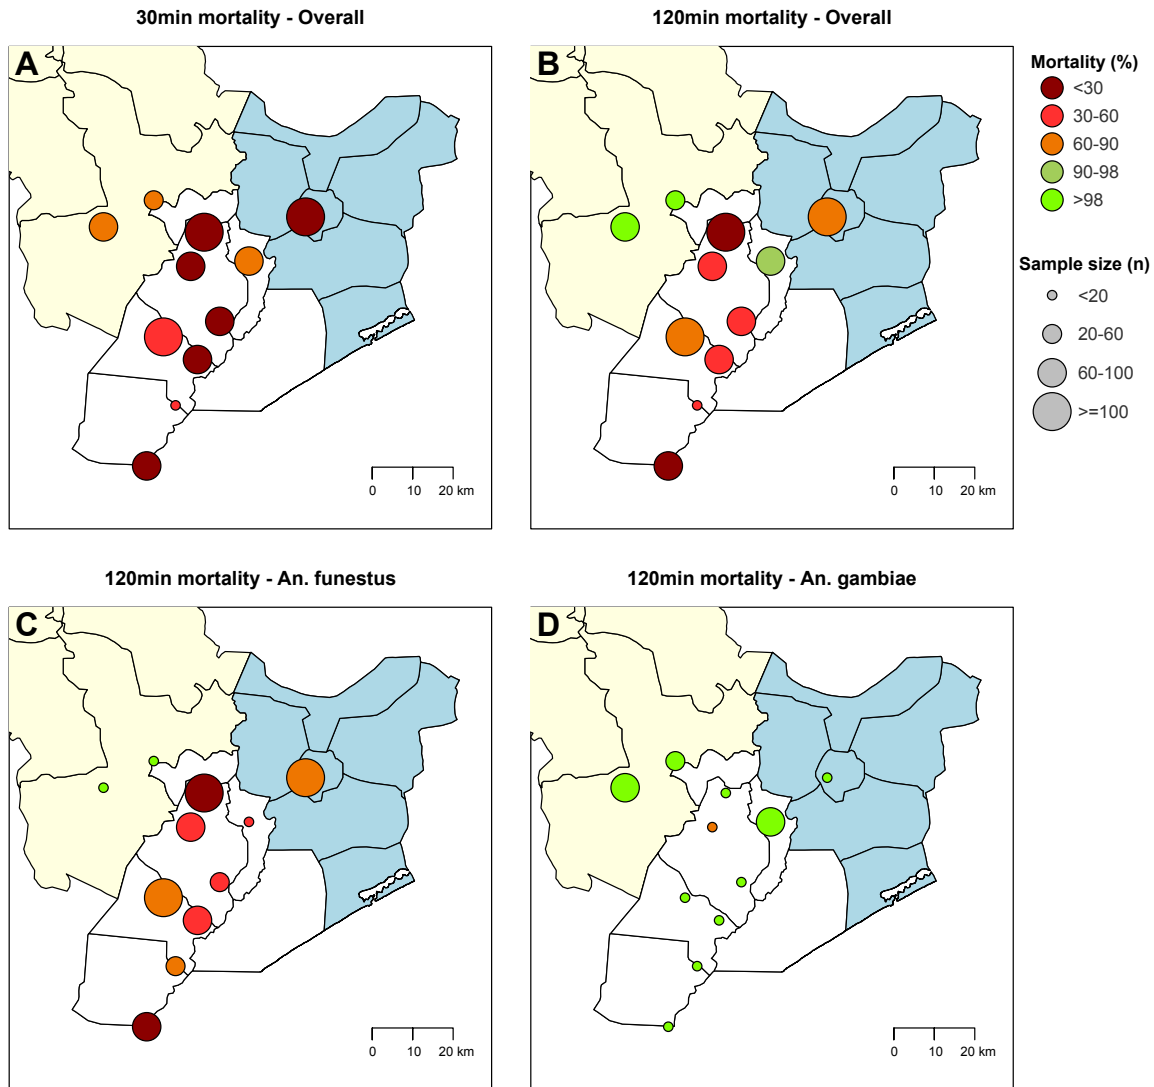

**Figure S1.** Spatial distribution of mortality of *Anopheles* spp populations in CDC bottle bioassays at 1x deltamethrin following a 30min exposure (A) and 120min exposure (B). Mortality following 120min exposure after mosquito identification is shown for *An. funestus* s.s. (C) and *An. gambiae* s.l. (predominantly *An. arabiensis*) (D). Levels of mortality are indicated by different colors ranging from less than 30% to over 98%, sample size of exposed mosquitoes in the bottles is demonstrated by the size of the circle. Palmeira data is from neighborhood 1°/2°/4° Bairro.

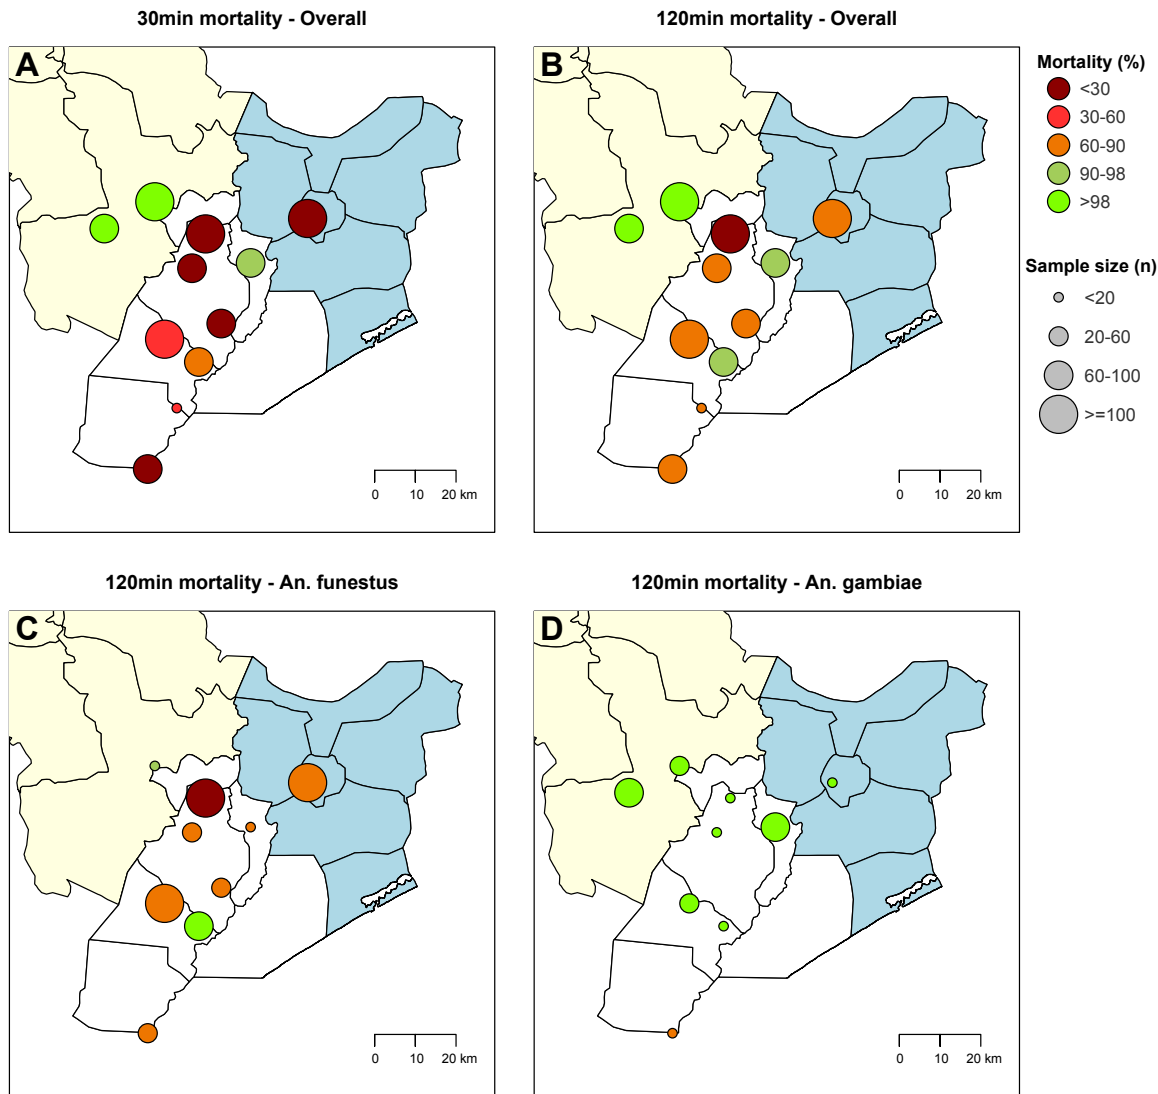

**Figure S2.** Spatial distribution of mortality of *Anopheles* spp populations in CDC bottle bioassays at 5x deltamethrin following a 30min exposure (A) and 120min exposure (B). Mortality following 120min exposure after mosquito identification is shown for *An. funestus* s.s. (C) and *An. gambiae* s.l. (predominantly *An. arabiensis*) (D). Levels of mortality are indicated by different colors ranging from less than 30% to over 98%, sample size of exposed mosquitoes in the bottles is demonstrated by the size of the circle. Palmeira data is from neighborhood 1°/2°/4° Bairro.

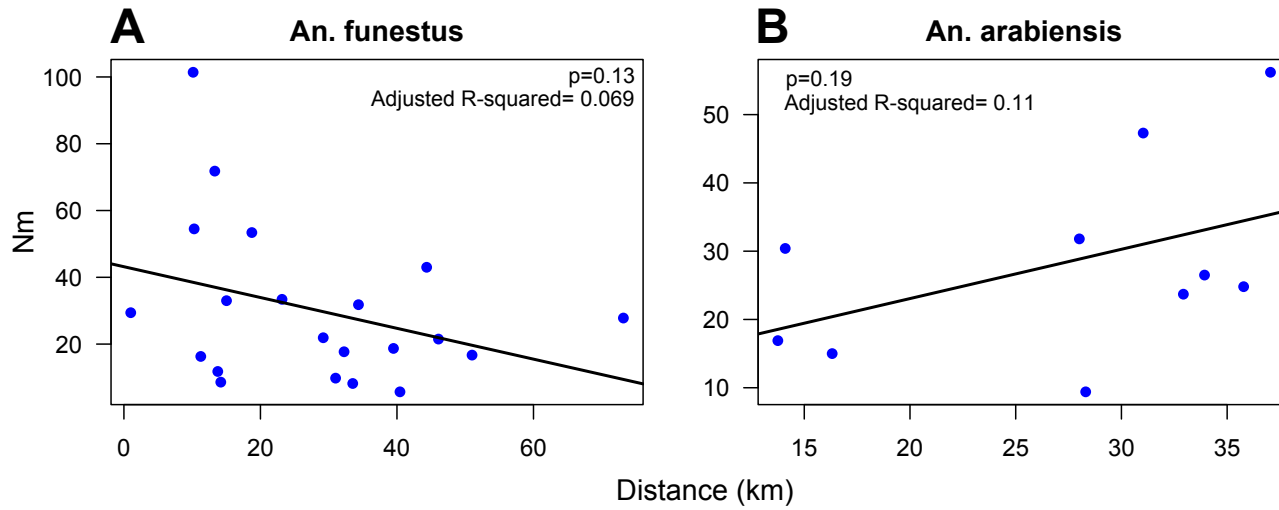

**Figure S3.** Estimated number of migrants per generation between two locations by distance (in kilometers) for *An. funestus* s.s. (A) and *An. arabiensis* (B). Trendline shows linear regression and p-value shows level of significance for the impact of distance.

a) *An. arabiensis*

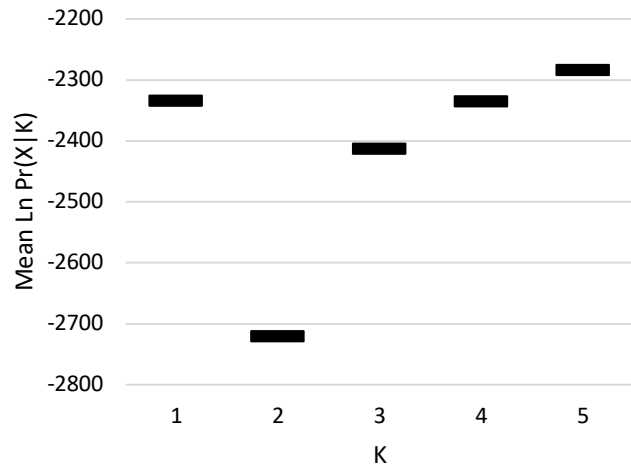

b) *An. funestus*

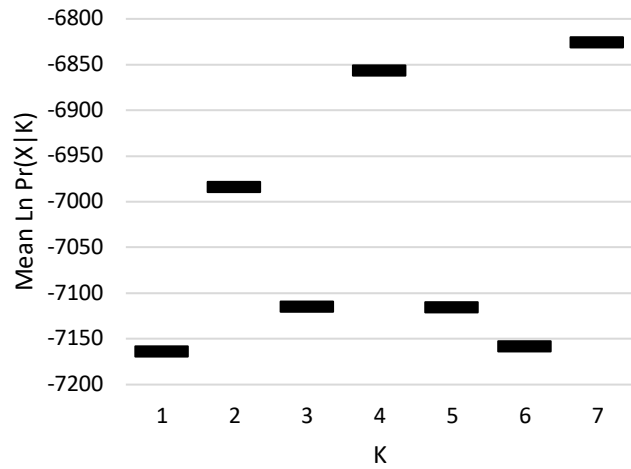

**Figure S4.** Estimated population structure from STRUCTURE analyses for a) *Anopheles arabiensis* and b) *An. funestus*. The mean posterior probability  $\text{Ln Pr}(X|K)$  based on 5 replicated runs for each clusters K=1 to K=5 for *An. arabiensis* and K=1 to K=7 for *An. funestus*.
